# Supplementary material for: Exogenous Putrescine Increases Heat Tolerance in Tomato Seedlings by Regulating Chlorophyll Metabolism and Enhancing Antioxidant Defense Efficiency
Source: MDPI journal article supplement (doi:10.3390/plants11081038), 2022-04-11
Supplement: s1 [file s1]

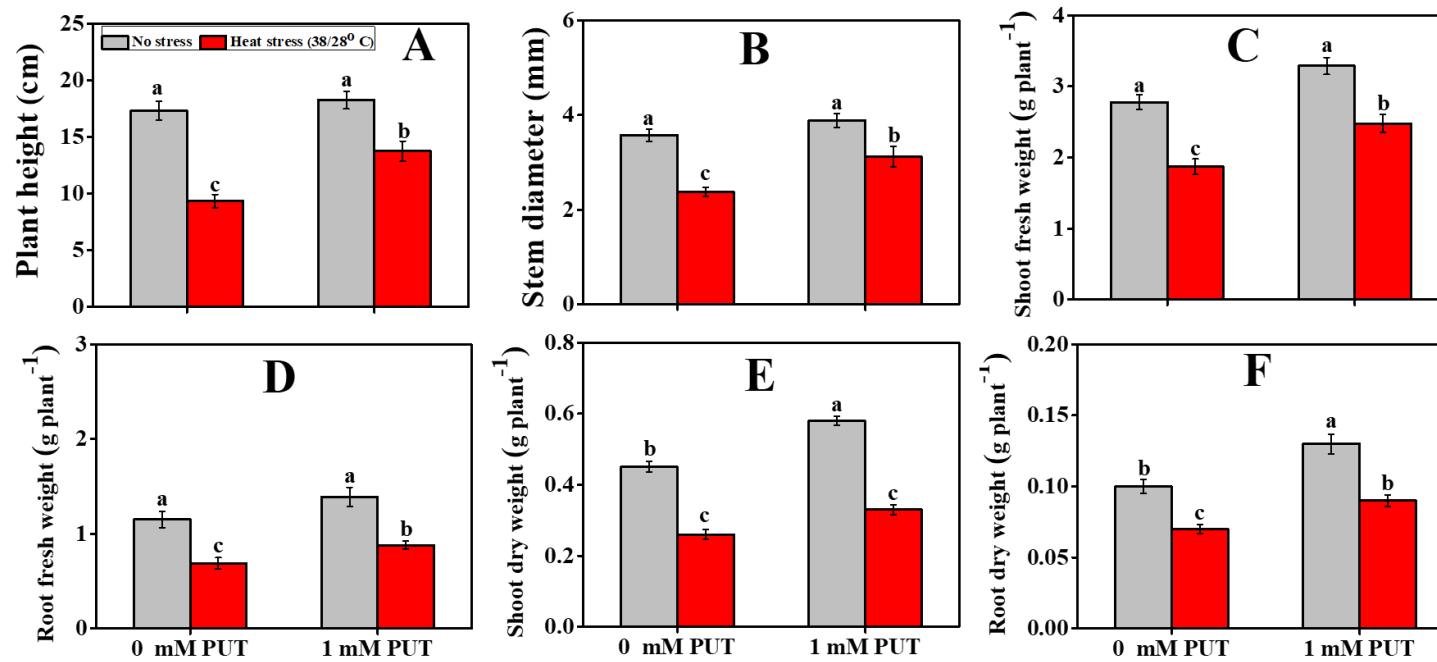

**Figure S1.** Interactive effects of Put and high temperature on growth parameters in tomato seedlings. (A) Plant height, (B) Stem diameter, (C) Shoot fresh weight, (D) Root fresh weight, (E) Shoot dry weight and (F) Root dry weight. The data denote the mean value  $\pm$  standard error (n = 3). Different alphabetic letters represent the significant differences among the treatments at  $P < 0.05$ , according to Tukey's test.

**Table S1.** List of primers used in this study.

| <b>Gene<br/>Acronym</b> | <b>Accession<br/>Number</b> | <b>Forward Primer</b>    | <b>Reverse Primer</b>    |
|-------------------------|-----------------------------|--------------------------|--------------------------|
| <i>FeSOD</i>            | Solyc06g048410              | GCAGTCAGTATTAGGCTTA      | CCATCAACTACATAAAACAACA   |
| <i>MnSOD</i>            | XM_004240820                | GGAACACGCATACTACTT       | GTAAACATCATTGGCATATTTTC  |
| <i>CAT</i>              | Solyc12g094620              | GCAGCTCCCAGTTAATGCTC     | AGCAGGACGACAAGGATCAA     |
| <i>POD</i>              | Solyc07g052510              | GGTCTGTTCCAATCCGATGC     | CACCAGCACTCCCTGTCTTA     |
| <i>APX</i>              | Solyc06g005150              | GGCACTCTGCTGGTACCTAT     | GGAGAGAGTGGGAAACTGCT     |
| <i>GR</i>               | Solyc09g065900              | GGAGCCATAGAGGTTGACGA     | CTCCTCCCTCCATCAAAGCA     |
| <i>MDHAR</i>            | Solyc08g081530              | CGGACAGTTCCGAACAAACA     | CCCGTGCAATTTCGGTTGTAT    |
| <i>DHAR</i>             | Solyc05g054760              | GAGGTGAACCCTGAAGGGAA     | CCCACAGAGGCAAATTCAGG     |
| <i>LOX</i>              | Solyc01g099190              | TTGGCTTATACTCTTACG       | GAATACCTTGTCTGGATT       |
| <i>HSP90</i>            | Solyc05g010670              | GCAATGGCTCTTGAGGAAG      | CGGTCCTTACTCAGATGGCT     |
| <i>HSP70</i>            | Solyc04g009320              | AGATGTATAATGCGATGGAT     | ATTGCTTCACTCACTCAT       |
| <i>HSfAl</i>            | Solyc08g005170              | CCCAGTGCTACAGGAAGTGA     | TCATCAGCCACTGGTTCCAT     |
| <i>SGR</i>              | Solyc06g069640              | TTCTCAGTTGCAAGGTTGGT     | CCTTGAGAACCACAGGGAGT     |
| <i>PAO</i>              | Solyc04g039880              | AAATGCCCTCATCGTCTTGC     | AGCACAAGCTCTTGAGACT      |
| <i>NYC1</i>             | Solyc07g024000              | CAGGCAGCTTCAATCATCCC     | TAGGTCGGTTAGGACCATGC     |
| <i>POR</i>              | Solyc12g013710              | ATGATTGACGGTGGTGACTTTG   | CTCCCTGAATAGCCCTGTTGTC   |
| <i>CAO</i>              | Solyc04g024920              | CACGAAGAACGCTGAATGTCTC   | GCTCAAAGCAATCAATCGGTAAC  |
| <i>CHL G</i>            | Solyc09g014760              | GGTCTGGGCATAGCCATTGT     | CTGGAAGTGACTGAAGCCCC     |
| <i>PBGD</i>             | Solyc07g066470              | TGGAGCAGATGTTGTCAGTC     | GCATACTTCGCTGTGTAAGAC    |
| <i>MG-CHT</i>           | XM_015217369.1              | AAGCACCTGGTAATCTGAACTCTG | CATCGGGTCACCTTCGTATC     |
| <i>CHLASE</i>           | Solyc06g053980              | CATAGCCGTGGGGGAAAAGT     | TGAAATCATTGGAGGAGTCTTTGC |
| <i>ACTIN</i>            | Solyc03g078400              | TGGTCGGAATGGGACAGAAG     | CTCAGTCAGGAGAACAGGGT     |
